# Supplementary material
Source: MDPI journal article supplement (https://www.mdpi.com/2071-1050/16/9/3565)
Supplement: s1 [file s1]

# Roles of microbial community and keystone taxa in rice productivity under green manuring in south China

**Table S1** Primers and PCR conditions used for quantitative PCR

| Function           | Primer              | Sequence (5'-3')                                              | Amplico<br>n length<br>(bp) | Efficien<br>cy (%) | Reference                        |
|--------------------|---------------------|---------------------------------------------------------------|-----------------------------|--------------------|----------------------------------|
| <i>nifH</i>        | PolyF/Poly<br>R     | TGCGAYCCSAARGCBGACTC<br>/ATSGCCATCATYTCRCCGGA                 | 360                         | 84.10              | (Shu et al.,<br>2012)            |
| AOA<br><i>amoA</i> | 26F/417R            | GACTACATMTTCTAYACWGA<br>YTGGGC/GGKGTCATRTATGGWGG<br>YAAYGTTGG | 415                         | 83.50              | (Park et al.,<br>2008)           |
| AOB<br><i>amoA</i> | 1F/2R               | GGGGTTTCTACTGGTGGT/<br>CCCCTCKGSAAAGCCTTCTTC                  | 500                         | 80.70              | (Rotthauwe<br>et al., 1997)      |
| <i>narG</i>        | 1962m2F/20<br>50m2R | TAYGTSGGGCAGGARAAACTG/<br>CGTAGAAGAAGCTGGTGCTGTT              | 110                         | 83.60              | (Kandeler<br>et al., 2006)       |
| <i>nirS</i>        | cd3aF/R3cd          | GTSAACGTSAAGGARACSGG/<br>GASTTCGGRTGSGTCTTGA                  | 425                         | 85.30              | (Kandeler<br>et al., 2006)       |
| <i>nirK</i>        | F1aCu/R3C<br>u      | ATCATGGTSCGTCCGCG/GCCTCGA<br>TCAGRTTGTGGTT                    | 473                         | 81.80              | (Levy-<br>Booth et al.,<br>2014) |
| <i>nosZ</i>        | 1126F/1381<br>R     | GGGCTBGGGCCRTTGCA/GAAGCG<br>RTCCTTSGARAACCTG                  | 252                         | 84.20              | (Chen et al.,<br>2012)           |

**Table S2** Good's coverage for each sample (%)

| Repetition   | 16S rRNA for bacteria |       |       |       | ITS for fungi |       |       |        |
|--------------|-----------------------|-------|-------|-------|---------------|-------|-------|--------|
|              | GQ_G                  | GQ_   | NX_GM | NX_WF | GQ_GM         | GQ_WF | NX_GM | NX_WF  |
|              | M                     | WF    |       |       |               |       |       |        |
| Repetition 1 | 96.30                 | 96.41 | 96.23 | 96.33 | 99.98         | 99.97 | 99.99 | 99.99  |
| Repetition 2 | 96.05                 | 96.83 | 96.91 | 97.49 | 99.98         | 99.99 | 99.98 | 99.99  |
| Repetition 3 | 95.80                 | 96.99 | 96.21 | 98.68 | 99.98         | 99.98 | 99.98 | 99.99  |
| Repetition 4 | 97.12                 | 96.57 | 96.13 | 99.60 | 99.99         | 99.97 | 99.99 | 100.00 |
| Repetition 5 | 96.92                 | 96.49 | 96.80 | 96.24 | 99.99         | 99.97 | 99.99 | 100.00 |
| Repetition 6 | 97.03                 | 96.68 | 98.35 | 97.92 | 99.99         | 99.99 | 99.99 | 100.00 |

GQ, Gaoqiao site; NX, Nanxian site; GM, green manure treatment; WF, winter fallow treatment.

Numbers after the repetitions of each treatment. GQ\_GM, green manure treatment at Gaoqiao site;

GQ\_WF, winter fallow treatment at Gaoqiao site; NX\_GM, green manure treatment at Nanxian site;

NX\_WF, winter fallow treatment at Nanxian site.

**Table S3** Soil properties in different treatments at the two sites in 2019

| Treatm         | pH     | SOM                   | TN                    | AP                     | AK                     | NH <sub>4</sub> <sup>+</sup> -N | NO <sub>3</sub> <sup>-</sup> -N | DOC                    | DON                    |
|----------------|--------|-----------------------|-----------------------|------------------------|------------------------|---------------------------------|---------------------------------|------------------------|------------------------|
| ent            |        | (g kg <sup>-1</sup> ) | (g kg <sup>-1</sup> ) | (mg kg <sup>-1</sup> ) | (mg kg <sup>-1</sup> ) | (mg kg <sup>-1</sup> )          | (mg kg <sup>-1</sup> )          | (mg kg <sup>-1</sup> ) | (mg kg <sup>-1</sup> ) |
|                |        |                       |                       | <sup>1)</sup>          |                        |                                 |                                 |                        |                        |
| GQ_G           | 5.43   | 21.93                 | 1.51                  | 21.27                  | 109.66                 | 3.43                            | 8.30                            | 35.59                  | 4.76                   |
| M              | (0.16) | (1.82)                | (0.16)                | (3.84)                 | (20.62)                | (1.00)                          | (0.44)                          | (9.58)                 | (1.53)                 |
| GQ_W           | 5.33   | 23.28                 | 1.48                  | 24.40                  | 97.00                  | 2.73                            | 10.60                           | 17.39                  | 2.99                   |
| F              | (0.14) | (1.68)                | (0.09)                | (4.81)                 | (20.86)                | (0.74)                          | (0.54)                          | (1.99)                 | (0.38)                 |
| <i>P</i> value | 0.139  | 0.222                 | 0.789                 | 0.421                  | 0.244                  | 0.604                           | <b>0.008**</b>                  | 0.079                  | 0.228                  |
| NX_G           | 8.04   | 53.96                 | 2.45                  | 11.09                  | 57.84                  | 50.10                           | 16.01                           | 18.38                  | 5.63                   |
| M              | (0.03) | (7.41)                | (0.10)                | (2.11)                 | (1.25)                 | (8.32)                          | (2.98)                          | (2.49)                 | (0.55)                 |
| NX_W           | 8.09   | 41.50                 | 2.15                  | 10.00                  | 62.17                  | 34.59                           | 17.58                           | 21.75                  | 5.17                   |
| F              | (0.02) | (4.13)                | (0.12)                | (0.95)                 | (0.89)                 | (3.12)                          | (1.71)                          | (3.52)                 | (0.65)                 |
| <i>P</i> value | 0.150  | 0.074                 | 0.101                 | 0.690                  | 0.063                  | 0.084                           | 0.606                           | 0.331                  | 0.490                  |

SOM, soil organic matter; TN, total nitrogen; AP, available phosphorus; AK, available potassium; DOC,

dissolved organic carbon; DON, dissolved organic nitrogen. Values in the bracket represent standard

error. Table S2 shows treatment abbreviations.

**Table S4** Topological properties of bacterial and fungal co-occurrence networks

| Network indexes                                 | Bacterial community |             |            |            | Fungal community |            |           |           |
|-------------------------------------------------|---------------------|-------------|------------|------------|------------------|------------|-----------|-----------|
|                                                 | GQ_GM               | GQ_WF       | NX_GM      | NX_WF      | GQ_GM            | GQ_WF      | NX_GM     | NX_WF     |
| <i>Empirical networks</i>                       |                     |             |            |            |                  |            |           |           |
| Number of nodes                                 | 860                 | 669         | 852        | 879        | 179              | 124        | 119       | 85        |
| Number of edges                                 | 1687                | 972         | 2779       | 3807       | 673              | 218        | 232       | 135       |
| Positive correlations (%)                       | 72.38               | 56.28       | 54.7       | 75.36      | 50.52            | 55.96      | 46.12     | 54.07     |
| Negative correlations (%)                       | 27.62               | 43.72       | 45.3       | 24.64      | 49.48            | 44.04      | 53.88     | 45.93     |
| R <sup>2</sup> of power-law                     | 0.783               | 0.797       | 0.828      | 0.696      | 0.458            | 0.644      | 0.61      | 0.689     |
| Average connectivity                            | 3.923               | 2.906       | 6.523      | 8.662      | 7.52             | 3.516      | 3.899     | 3.176     |
| Average clustering coefficient ( <i>avgCC</i> ) | 0.425               | 0.477       | 0.273      | 0.506      | 0.536            | 0.324      | 0.304     | 0.29      |
| Average path length (GD)                        | 8.215               | 8.542       | 5.098      | 6.206      | 5.285            | 6.049      | 4.74      | 5.541     |
| Transitivity                                    | 0.512               | 0.56        | 0.23       | 0.581      | 0.498            | 0.465      | 0.324     | 0.386     |
| Connectedness                                   | 0.472               | 0.241       | 0.866      | 0.717      | 0.913            | 0.875      | 0.902     | 0.908     |
| Modularity & (the number of modules)            | 0.856 (98)          | 0.923 (130) | 0.558 (48) | 0.751 (63) | 0.616 (10)       | 0.763 (12) | 0.673 (9) | 0.723 (9) |
| <i>Random networks</i>                          |                     |             |            |            |                  |            |           |           |
| <i>avgCC</i> ± SD                               | 0.007 ±             | 0.005 ±     | 0.023 ±    | 0.035 ±    | 0.077 ±          | 0.028 ±    | 0.036 ±   | 0.036 ±   |
|                                                 | 0.002               | 0.003       | 0.003      | 0.003      | 0.008            | 0.010      | 0.013     | 0.016     |
| GD ± SD                                         | 4.756 ±             | 5.731 ±     | 3.627 ±    | 3.313 ±    | 2.859 ±          | 3.847 ±    | 3.562 ±   | 3.820 ±   |
|                                                 | 0.030               | 0.068       | 0.019      | 0.017      | 0.029            | 0.086      | 0.047     | 0.110     |
| Modularity ± SD                                 | 0.526 ±             | 0.654 ±     | 0.358 ±    | 0.291 ±    | 0.301 ±          | 0.514 ±    | 0.477 ±   | 0.526 ±   |

|       |       |       |       |       |       |       |       |
|-------|-------|-------|-------|-------|-------|-------|-------|
| 0.004 | 0.005 | 0.003 | 0.003 | 0.007 | 0.014 | 0.012 | 0.016 |
|-------|-------|-------|-------|-------|-------|-------|-------|

Table S2 shows treatment abbreviations.

**Table S5** Keystone ASVs identified in the combined bacterial-fungal networks documented with taxonomy assignments and the degree of co-occurrence values

|          | Phylum           | Class            | Order            | Family                    | Genus                     | Degree | ASV ID |
|----------|------------------|------------------|------------------|---------------------------|---------------------------|--------|--------|
| GQ_GM    |                  |                  |                  |                           |                           |        |        |
| Bacteria | Acidobacteria    | Acidobacteriia   | Acidobacteriales | uncultured                | uncultured bacterium      | 8      | bASV1  |
|          | Actinobacteria   | Acidimicrobiia   | uncultured       | unclassified_uncultured   | unclassified_uncultured   | 4      | bASV2  |
|          | Bacteroidetes    | Ignavibacteriia  | Kryptoniales     | BSV26                     | uncultured bacterium      | 9      | bASV3  |
|          | Chloroflexi      | Anaerolineae     | Anaerolineales   | Anaerolineaceae           | uncultured                | 14     | bASV4  |
|          |                  |                  |                  |                           |                           | 9      | bASV5  |
|          |                  |                  |                  |                           | Leptolinea                | 33     | bASV6  |
|          |                  |                  | RBG-13-54-9      | uncultured                | uncultured                | 11     | bASV7  |
|          |                  |                  |                  | Anaerolineaceae bacterium | Anaerolineaceae bacterium |        |        |
|          |                  |                  |                  | unclassified_RBG-13-54-9  | unclassified_RBG-13-54-9  | 33     | bASV8  |
|          |                  |                  |                  |                           |                           | 14     | bASV9  |
|          | Gemmatimonadetes | Gemmatimonadetes | Gemmatimonadales | Gemmatimonadaceae         | uncultured                | 9      | bASV10 |

|       |                     |                         |                                      |                                                                  |                                                                  |    |            |
|-------|---------------------|-------------------------|--------------------------------------|------------------------------------------------------------------|------------------------------------------------------------------|----|------------|
|       | Patesci<br>bacteria | Parcubacteria           | Candidatus<br>s<br>Jorgensenbacteria | Candidatus<br>Adlerbacteria<br>bacterium<br>GW2011_GWC1_5<br>0_9 | Candidatus<br>Adlerbacteria<br>bacterium<br>GW2011_GWC1_5<br>0_9 | 13 | bASV1<br>1 |
|       | Proteo<br>bacteria  | Gamma<br>proteobacteria | Betaproteobacteriales                | Gallionellaceae                                                  | Candidatus<br>Nitrotoga                                          | 33 | bASV1<br>2 |
|       |                     |                         |                                      |                                                                  | Sideroxydans                                                     | 6  | bASV1<br>3 |
|       |                     | Deltaproteobacteria     | Myxococcales                         | mle1-27                                                          | uncultured<br>Sorangiineae<br>bacterium                          | 33 | bASV1<br>4 |
|       |                     |                         |                                      | Haliangiaceae                                                    | Haliangium                                                       | 33 | bASV1<br>5 |
|       |                     | Alphaproteobacteria     | Acetobacterales                      | Acetobacteraceae                                                 | uncultured                                                       | 11 | bASV1<br>6 |
|       |                     |                         | Rhizobiales                          | Beijerinckiaceae                                                 | Methylocystis                                                    | 11 | bASV1<br>7 |
|       |                     | Gamma<br>proteobacteria | Betaproteobacteriales                | Gallionellaceae                                                  | unclassified_Gallionellaceae                                     | 6  | bASV1<br>8 |
| Fungi | Ascomycota          | Leotiomyces             | Helotiales                           | Dermateaceae                                                     | Mollisia                                                         | 32 | fASV1      |
|       |                     | Saccharomycetes         | Saccharomycetales                    | Saccharomycetaceae                                               | Issatchenkia                                                     | 32 | fASV2      |
|       |                     | Sordariomycetes         | Sordariales                          | Sordariaceae                                                     | Neurospora                                                       | 32 | fASV3      |
|       | unclassified        | unclassified            | unclassified                         | unclassified_Fungi                                               | unclassified_Fungi                                               | 32 | fASV4      |

|          |                  |                     |                      |                                  |                                  |    |        |
|----------|------------------|---------------------|----------------------|----------------------------------|----------------------------------|----|--------|
|          | ified_Fungi      | ied_Fungi           | d_Fungi              |                                  | i                                | 33 | fASV5  |
|          |                  |                     |                      |                                  |                                  | 33 | fASV6  |
|          |                  |                     |                      |                                  |                                  | 10 | fASV7  |
| GQ_WF    |                  |                     |                      |                                  |                                  |    |        |
| Bacteria | Acidobacteria    | Acidobacteriia      | Acidobacteriales     | uncultured                       | uncultured bacterium             | 9  | bASV19 |
|          | Chloroflexi      | Anaerolineae        | Anaerolineales       | Anaerolineaceae                  | Anaerolinea                      | 11 | bASV20 |
|          |                  |                     |                      |                                  | Leptolinea                       | 10 | bASV21 |
|          |                  |                     |                      |                                  | uncultured                       | 9  | bASV22 |
|          |                  | KD4-96              | uncultured bacterium | uncultured bacterium             | uncultured bacterium             | 10 | bASV23 |
|          |                  |                     | unclassified_KD4-96  | unclassified_KD4-96              | unclassified_KD4-96              | 8  | bASV24 |
|          |                  |                     |                      |                                  |                                  | 4  | bASV25 |
|          | Gemmatimonadetes | Gemmatimonadetes    | Gemmatimonadales     | Gemmatimonadaceae                | uncultured                       | 9  | bASV26 |
|          | Planctomycetes   | Planctomycetacia    | Isosphaerales        | Isosphaeraceae                   | Singulisphaera                   | 9  | bASV27 |
|          | Proteobacteria   | Deltaproteobacteria | Myxococcales         | Polyangiaceae                    | Pajaroellobacter                 | 7  | bASV28 |
|          |                  |                     | Sva0485              | uncultured delta proteobacterium | uncultured delta proteobacterium | 8  | bASV29 |



|                  |                            |                             |                                  |                                    |                                    |    |            |
|------------------|----------------------------|-----------------------------|----------------------------------|------------------------------------|------------------------------------|----|------------|
|                  |                            |                             | Syntropho<br>bacterales          | Syntrophobacterac<br>eae           | uncultured                         | 5  | bASV3<br>0 |
| Fu<br>ng<br>i    | unclass<br>ified_F<br>ungi | unclassif<br>ied_Fun<br>gi  | unclassifie<br>d_Fungi           | unclassified_Fungi                 | unclassified_Fung<br>i             | 10 | fASV8      |
| NX_GM            |                            |                             |                                  |                                    |                                    |    |            |
| Ba<br>cte<br>ria | Nitros<br>pinae            | P9X2b3<br>D02               | uncultured<br>bacterium          | uncultured<br>bacterium            | uncultured<br>bacterium            | 22 | bASV3<br>1 |
|                  | Proteo<br>bacteri<br>a     | Deltapro<br>teobacter<br>ia | Myxococca<br>les                 | Archangiaceae                      | Anaeromyxobacte<br>r               | 22 | bASV3<br>2 |
|                  |                            | Gamma<br>proteoba<br>cteria | CCD24                            | unclassified_CCD<br>24             | unclassified_CCD<br>24             | 22 | bASV3<br>3 |
| Fu<br>ng<br>i    | Ascom<br>ycota             | Sordario<br>mycetes         | Sordariales                      | Chaetomiaceae                      | Zopfiella                          | 22 | fASV9      |
| NX_WF            |                            |                             |                                  |                                    |                                    |    |            |
| Ba<br>cte<br>ria | Acidob<br>acteria          | Subgrou<br>p 17             | unclassifie<br>d_Subgrou<br>p 17 | unclassified_Subgr<br>oup 17       | unclassified_Subg<br>roup 17       | 6  | bASV3<br>4 |
|                  |                            | Subgrou<br>p 6              | unclassifie<br>d_Subgrou<br>p 6  | unclassified_Subgr<br>oup 6        | unclassified_Subg<br>roup 6        | 6  | bASV3<br>5 |
|                  | Bactero<br>idetes          | Ignaviba<br>cteria          | Ignavibacte<br>riales            | Ignavibacteriaceae                 | Ignavibacterium                    | 12 | bASV3<br>6 |
|                  |                            |                             |                                  | unclassified_Ignav<br>ibacteriales | unclassified_Igna<br>vibacteriales | 26 | bASV3<br>7 |

|       |                  |                         |                         |                         |                         |    |            |
|-------|------------------|-------------------------|-------------------------|-------------------------|-------------------------|----|------------|
|       | Chloro<br>flexi  | KD4-96                  | uncultured<br>bacterium | uncultured<br>bacterium | uncultured<br>bacterium | 6  | bASV3<br>8 |
|       | GAL15            | uncultured<br>bacterium | uncultured<br>bacterium | uncultured<br>bacterium | uncultured<br>bacterium | 8  | bASV3<br>9 |
|       | Gemmatimonadetes | Gemmatimonadetes        | Gemmatimonadales        | Gemmatimonadaceae       | uncultured              | 11 | bASV4<br>0 |
|       | Nitrospirae      | Nitrospira              | Nitrospirales           | Nitrospiraceae          | Nitrospira              | 8  | bASV4<br>1 |
|       |                  |                         |                         |                         | Leptospirillum          | 10 | bASV4<br>2 |
|       |                  | Thermodesulfovibrio     | uncultured              | uncultured<br>bacterium | uncultured<br>bacterium | 26 | bASV4<br>3 |
|       | Proteobacteria   | Alphaproteobacteria     | Rhizobiales             | Methylobacteriaceae     | uncultured              | 5  | bASV4<br>4 |
|       |                  | Deltaproteobacteria     | Desulfuromonadales      | Geobacteraceae          | Geobacter               | 16 | bASV4<br>5 |
|       |                  |                         | NB1-j                   | unclassified_NB1-j      | unclassified_NB1-j      | 20 | bASV4<br>6 |
|       |                  |                         |                         | uncultured<br>bacterium | uncultured<br>bacterium | 8  | bASV4<br>7 |
| Fungi | Ascomycota       | Eurotiomycetes          | Eurotiales              | Aspergillaceae          | Aspergillus             | 18 | fASV10     |

|   |                    |                    |                    |                    |                    |    |        |
|---|--------------------|--------------------|--------------------|--------------------|--------------------|----|--------|
| i |                    | Dothideomycetes    | Capnodiales        | Cladosporiaceae    | Cladosporium       | 16 | fASV11 |
|   | unclassified_Fungi | unclassified_Fungi | unclassified_Fungi | unclassified_Fungi | unclassified_Fungi | 11 | fASV12 |

ASV ID only used in this analysis. bASV, the bacterial ASV, fASV, the fungal ASV. Table S2 shows treatment abbreviations.

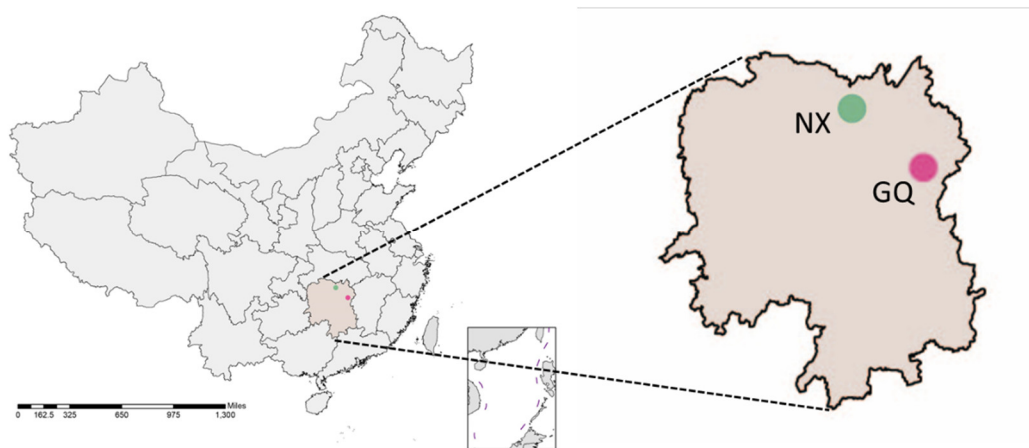

**Figure S1** field experiment map of two sites. GQ, Gaoqiao site; NX, Nanxian Site.

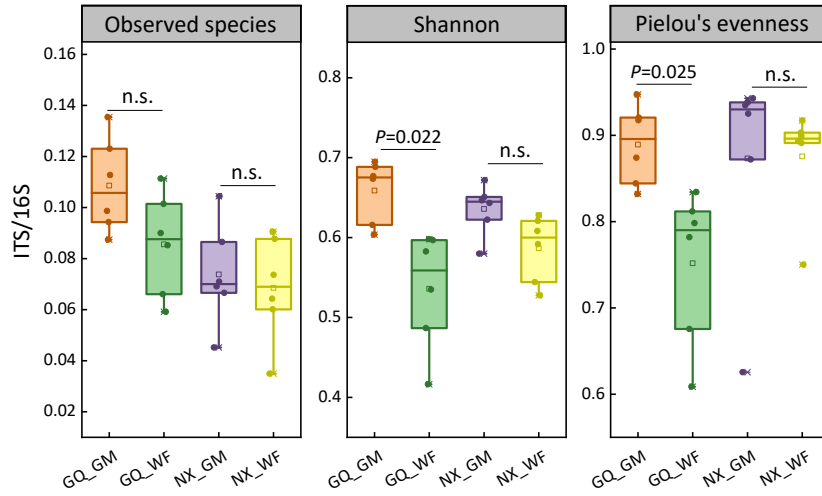

**Figure S2** Fungi-to-bacteria ratios (ITS/16S ratios) of observed species, Shannon index, and Pielou's evenness. GQ\_GM, green manure treatment at the Gaoqiao site; GQ\_WF, winter fallow treatment at the Gaoqiao site; NX\_GM, green manure treatment at the Nanxian site; NX\_WF, winter fallow treatment at the Nanxian site. The solid line and hollow block within each box represent the median and mean values, respectively. Top and bottom edges represent 75 and 25 percentiles, respectively. The solid circle represents value of each sample.

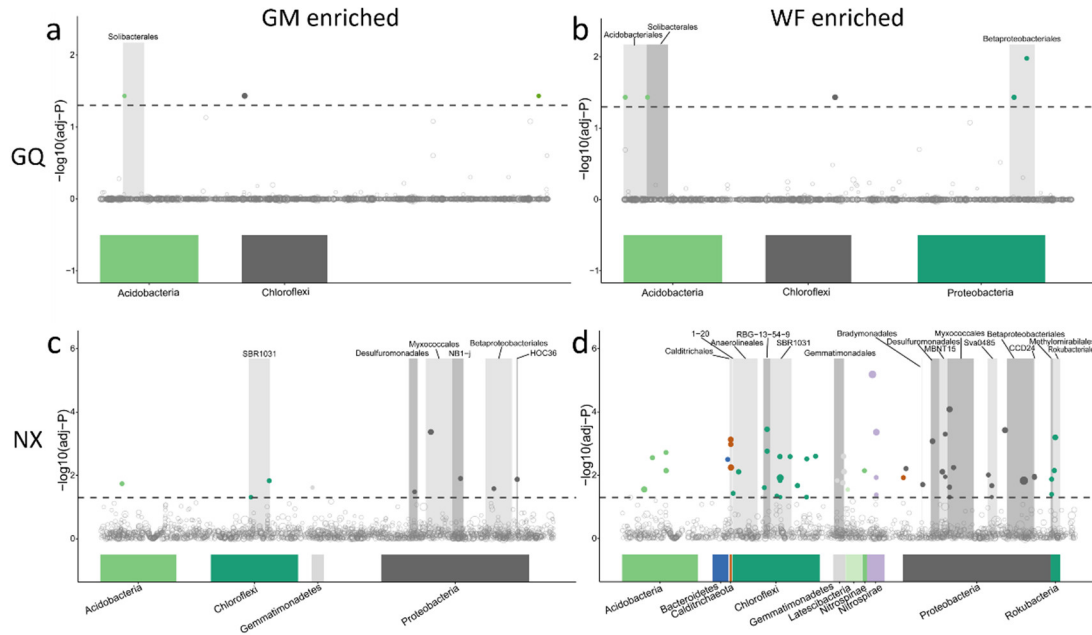

**Figure S3** Manhattan plots based on the MetagenomeSeq analysis of bacterial community showing GM-enriched ASVs at GQ (a), WF-enriched ASVs at GQ (b), GM-enriched ASVs at NX (c), and WF-enriched ASVs at NX (d) of bacteria. ASVs that are significantly enriched are depicted as full circles, and others are depicted as hollow circle. The dashed line separates the significantly enriched ASVs from others. The color of each full circle represents the different taxonomic affiliations of ASVs (phylum level), and the size represents the relative abundance of each ASV. Gray boxes are used to denote different taxonomic groups (phylum level).

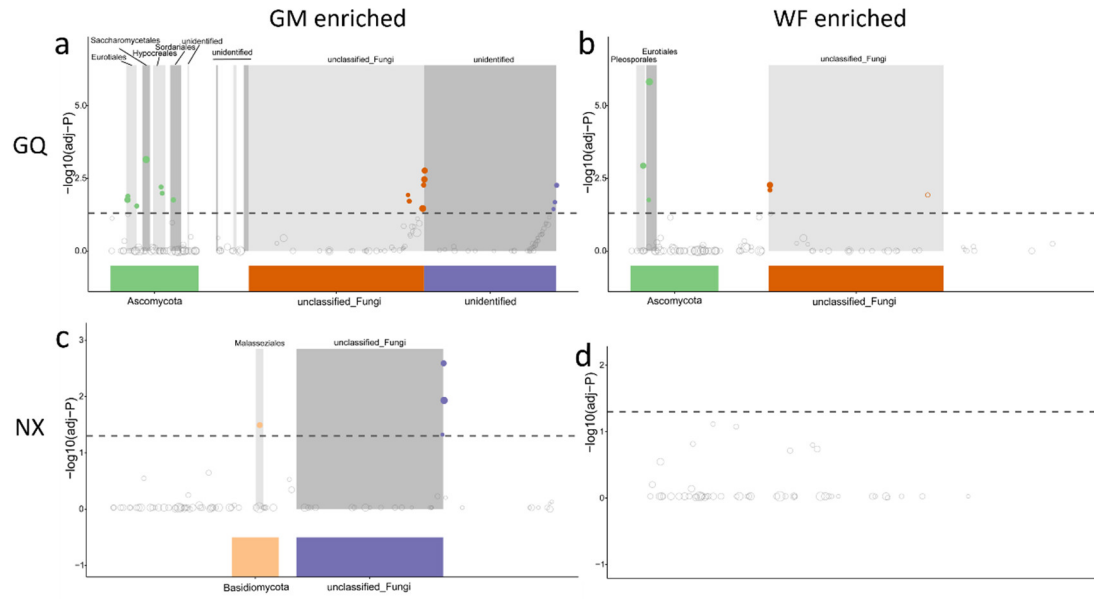

**Figure S4** Manhattan plots based on the MetagenomeSeq analysis of fungal community showing GM-enriched ASVs at GQ (a), WF-enriched ASVs at GQ (b), GM-enriched ASVs at NX (c), and WF-enriched ASVs at NX (d) of bacteria. ASVs that are significantly enriched are depicted as full circles, and others are depicted as hollow circle. The dashed line separates the significantly enriched ASVs from others. The color of each full circle represents the different taxonomic affiliations of ASVs (phylum level), and the size represents the relative abundance of each ASV. Gray boxes are used to denote different taxonomic groups (phylum level).

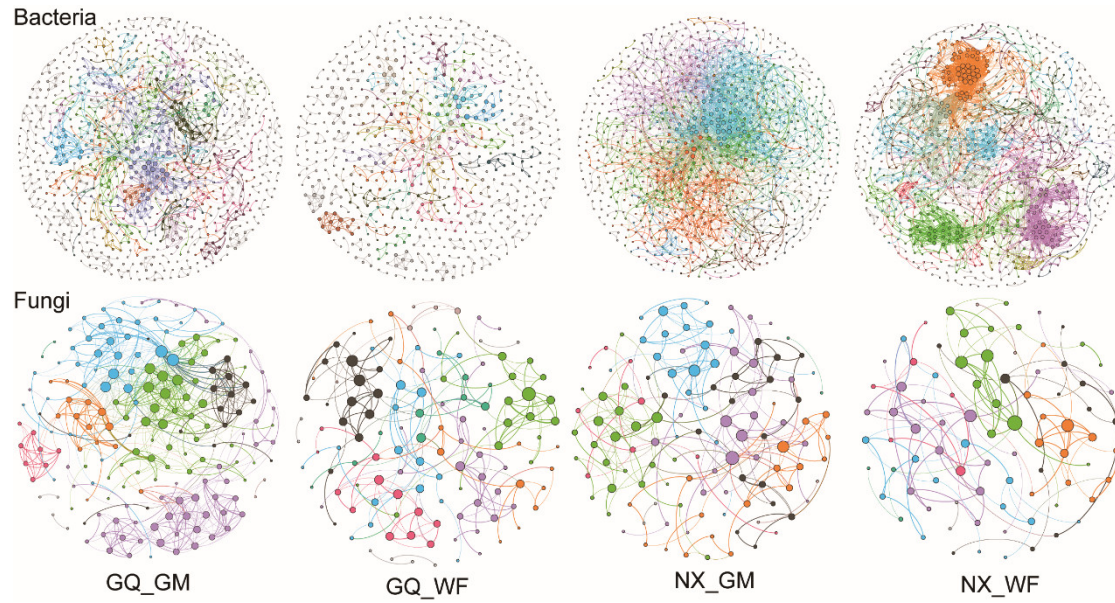

**Figure S5** Co-occurrence networks of bacterial and fungal communities. ASVs with relative abundance > 0.01% (1986 ASVs for bacteria and 1088 ASVs for fungi) are included in the construction of network. Co-occurrence networks are colored by module. The size of each node is proportional to degree. Figure S1 shows treatment abbreviations.



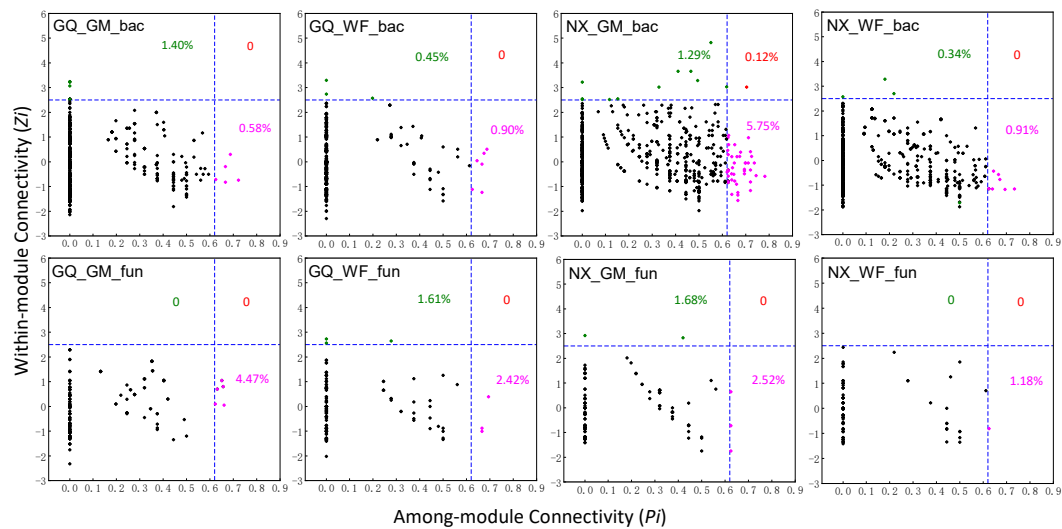

**Figure S6** Network roles of analyzing feature at the ASV level determined in accordance with within- ( $Z_i$ ) and among-module ( $P_i$ ) connectivity values. Figure S1 shows treatment abbreviations. bac represents bacterial network, whereas fun represents fungal network.

## References:

- Chen, Z., Liu, J., Wu, M., Xie, X., Wu, J., Wei, W., 2012. Differentiated response of denitrifying communities to fertilization regime in paddy soil. *Microb Ecol* 63, 446-459.
- Kandeler, E., Deiglmayr, K., Tscherko, D., Bru, D., Philippot, L., 2006. Abundance of *narG*, *nirS*, *nirK*, and *nosZ* genes of denitrifying bacteria during primary successions of a glacier foreland. *Appl Environ Microbiol* 72, 5957-5962.
- Levy-Booth, D.J., Prescott, C.E., Grayston, S.J., 2014. Microbial functional genes involved in nitrogen fixation, nitrification and denitrification in forest ecosystems. *Soil Biology and Biochemistry* 75, 11-25.
- Park, S.-J., Park, B.-J., Rhee, S.-K., 2008. Comparative analysis of archaeal 16S rRNA and *amoA* genes to estimate the abundance and diversity of ammonia-oxidizing archaea in marine sediments. *Extremophiles* 12, 605-615.
- Rotthauwe, J.H., Witzel, K.-P., Liesack, W., 1997. The ammonia monooxygenase structural gene *amoA* as a functional marker, molecular fine-scale analysis of natural ammonia-oxidizing populations. *Applied Environmental Microbiology* 63, 4704-4712.
- Shu, W., Pablo, G.P., Jun, Y., Danfeng, H., 2012. Abundance and diversity of nitrogen-fixing bacteria in rhizosphere and bulk paddy soil under different duration of organic management. *World J Microbiol Biotechnol* 28, 493-503.
